# Supplementary material
Source: MDPI journal article supplement (https://www.mdpi.com/2077-0472/11/11/1148)
Supplement: s1 [file s1]

**Table S1:** The list of accessions, their country origin, improvement status, plant height (PH), Days to heading (DH) and disease scores at seedling stage and adult stage (AUDPC)

| Entry number | USDA Reference | Taxonomy              | Origin  | Improvement Status    | Plant height PH in cm | Days to Heading DH | Seedling scores | AUDPC    | Adult response | Cluster 7A | Cluster 7B |
|--------------|----------------|-----------------------|---------|-----------------------|-----------------------|--------------------|-----------------|----------|----------------|------------|------------|
| 1            | PI 352409      | Bidi 17<br>Mohamed    | Algeria | Cultivar              | 150                   | 152                | 2               | 571.6049 | MR             | 3          | -          |
| 2            | PI 352443      | Ben Bachir            | Algeria | Landrace              | 135                   | 159                | 2               | 538.2716 | MR             | 3          | -          |
| 3            | PI 434902      | Giza 10               | Egypt   | Landrace              | 115                   | 159                | 2               | 353.7037 | R              | 4          | 4          |
| 4            | PI 434905      | Giza 13               | Egypt   | Landrace              | 130                   | 152                | 2               | 394.4444 | R              | 4          | 4          |
| 5            | PI 434907      | Giza 15               | Egypt   | Landrace              | 120                   | 152                | 2               | 432.0988 | R              | 4          | 4          |
| 6            | PI 434921      | Giza 29               | Egypt   | Landrace              | 125                   | 152                | 2               | 513.5802 | MR             | 4          | -          |
| 7            | PI 192003      | Giza 4                | Egypt   | Cultivar              | 150                   | 159                | 2               | 394.4444 | R              | 3          | 2          |
| 8            | PI 366100      | Baladi 116            | Egypt   | Cultivar              | 120                   | 159                | 2               | 367.284  | R              | 4          | 4          |
|              |                |                       |         | Uncertain improvement |                       |                    |                 |          |                |            |            |
| 9            | PI 366101      | Baladi<br>Bahtim      | Egypt   | status                | 135                   | 159                | 3               | 812.963  | S              | 1          | 3          |
| 10           | PI 278261      | Greece 14             | Greece  | Landrace              | 120                   | 159                | 2               | 333.3333 | R              | 4          | 4          |
| 11           | PI 469018      | MG 27074              | Greece  | Landrace              | 110                   | 145                | 2               | 538.2716 | MR             | 2          | -          |
| 12           | PI 469088      | MG 27976              | Greece  | Landrace              | 115                   | 138                | 2               | 412.963  | R              | 2          | 1          |
| 13           | PI 264933      | 339                   | Greece  | Landrace              | 130                   | 138                | 3               | 477.7778 | R              | 2          | 1          |
| 14           | PI 265019      | 216                   | Greece  | Landrace              | 145                   | 152                | 2               | 448.1481 | R              | 3          | 2          |
| 15           | PI 43251       | Lapsista              | Greece  | Landrace              | 145                   | 159                | 1               | 435.1852 | R              | 3          | 2          |
| 16           | PI 338527      | Ilektra               | Greece  | Cultivar              | 115                   | 145                | 2               | 460.4938 | R              | 2          | 1          |
| 17           | PI 43245       | Mavraani              | Greece  | Landrace              | 150                   | 159                | 1               | 469.1358 | R              | 3          | 2          |
| 18           | PI 264996      | 579                   | Greece  | Landrace              | 130                   | 159                | 2               | 421.6049 | R              | 3          | 4          |
|              |                |                       |         | Breeding              |                       |                    |                 |          |                |            |            |
| 19           | PI 295964      | W 8-1992              | Israel  | material              | 115                   | 152                | 2               | 394.4444 | R              | 4          | 4          |
| 20           | PI 52503       | Hati                  | Israel  | Landrace              | 135                   | 145                | 3               | 394.4444 | R              | 2          | 1          |
| 21           | PI 264951      | Timilia<br>Bufala     | Italy   | Cultivar              | 130                   | 159                | 4               | 872.2222 | S              | 1          | 3          |
| 22           | PI 264952      | Rossa                 | Italy   | Cultivar              | 145                   | 152                | 4               | 799.3827 | S              | 1          | 3          |
| 23           | PI 278347      | Biancuccia            | Italy   | Landrace              | 135                   | 159                | 2               | 355.5556 | R              | 3          | 2          |
| 24           | PI 352416      | Dauno III             | Italy   | Cultivar              | 140                   | 159                | 5               | 993.8272 | S              | 1          | 3          |
|              |                |                       |         | Breeding              |                       |                    |                 |          |                |            |            |
| 25           | PI 322738      | Maliani 7D<br>Aziziah | Italy   | material              | 140                   | 159                | 2               | 394.4444 | R              | 3          | 2          |
| 26           | PI 352415      | 17/45                 | Italy   | Cultivar              | 130                   | 159                | 3               | 619.7531 | MS             | 1          | -          |

|    |           |                            |         |                                      |     |     |   |          |    |   |   |
|----|-----------|----------------------------|---------|--------------------------------------|-----|-----|---|----------|----|---|---|
| 27 | PI 404588 | Valselva                   | Italy   | Cultivar                             | 85  | 152 | 2 | 553.0864 | MR | 4 | - |
| 28 | PI 278355 | Scorsonera                 | Italy   | Landrace                             | 160 | 152 | 2 | 329.6296 | R  | 3 | 2 |
| 29 | PI 278357 | Urria                      | Italy   | Landrace                             | 145 | 152 | 2 | 333.3333 | R  | 3 | 2 |
| 30 | PI 470758 | MG 4468                    | Italy   | Landrace                             | 150 | 159 | 2 | 500      | MR | 3 | - |
| 31 | PI 223159 | Jaljuli 45<br>Qutma        | Jordan  | Cultivar                             | 110 | 159 | 2 | 314.8148 | R  | 4 | 4 |
| 32 | PI 283153 | Horani                     | Jordan  | Landrace<br>Uncertain<br>improvement | 110 | 159 | 2 | 487.6543 | R  | 4 | 4 |
| 33 | PI 371822 | Diera Alla<br>2<br>Hourani | Jordan  | status                               | 85  | 159 | 2 | 433.3333 | R  | 4 | 4 |
| 34 | PI 371830 | Nowavi                     | Jordan  | Landrace                             | 100 | 152 | 3 | 533.9506 | MR | 4 | - |
| 35 | PI 371833 | Safra Maan                 | Jordan  | Landrace                             | 120 | 152 | 3 | 833.3333 | S  | 1 | 3 |
| 36 | PI 420940 | 14                         | Jordan  | Landrace                             | 130 | 159 | 3 | 783.9506 | S  | 1 | 3 |
| 37 | PI 487293 | SY 272                     | Jordan  | Landrace                             | 165 | 159 | 3 | 551.8519 | MR | 3 | - |
| 38 | PI 342645 | Haurani 27                 | Lebanon | Cultivar                             | 120 | 164 | 4 | 836.4198 | S  | 1 | 3 |
| 39 | PI 192487 | Merzaga                    | Morocco | Landrace<br>Breeding<br>material     | 135 | 159 | 4 | 686.4198 | MS | 1 | - |
| 40 | PI 278653 | 738                        | Morocco | material                             | 130 | 152 | 3 | 335.1852 | R  | 4 | 4 |
| 41 | PI 525374 | 1208                       | Morocco | Landrace<br>Uncertain<br>improvement | 120 | 152 | 3 | 564.8148 | MR | 4 | - |
| 42 | PI 525383 | 1230                       | Morocco | status                               | 130 | 159 | 4 | 748.1481 | S  | 1 | 3 |
| 43 | PI 525393 | 1263                       | Morocco | Landrace                             | 150 | 161 | 2 | 555.5556 | MR | 3 | - |
| 44 | PI 525394 | 1264                       | Morocco | Landrace<br>Uncertain<br>improvement | 140 | 161 | 4 | 674.6914 | MS | 1 | - |
| 45 | PI 525405 | 1292                       | Morocco | status<br>Uncertain<br>improvement   | 150 | 159 | 3 | 565.4321 | MR | 3 | - |
| 46 | PI 192488 | Agadir                     | Morocco | status                               | 130 | 159 | 5 | 672.8395 | MS | 1 | - |
| 47 | PI 525392 | 1262                       | Morocco | Landrace                             | 150 | 161 | 2 | 585.8025 | MR | 3 | - |
| 48 | PI 525397 | 1273                       | Morocco | Landrace                             | 150 | 159 | 3 | 711.1111 | MS | 1 | - |
| 49 | PI 525398 | 1274                       | Morocco | Landrace                             | 150 | 159 | 3 | 435.1852 | R  | 3 | 2 |
| 50 | PI 525399 | 1275                       | Morocco | Landrace                             | 135 | 159 | 4 | 711.1111 | MS | 1 | - |
| 51 | PI 525404 | 1291                       | Morocco | Landrace                             | 130 | 161 | 5 | 709.8765 | MS | 1 | - |
| 52 | PI 525390 | 1260                       | Morocco | Landrace                             | 140 | 161 | 3 | 823.4568 | S  | 1 | 3 |
| 53 | PI 525391 | 1261                       | Morocco | Landrace                             | 150 | 161 | 2 | 541.9753 | MR | 3 | - |

|    |           |                        |          |                              |     |     |   |          |    |   |   |
|----|-----------|------------------------|----------|------------------------------|-----|-----|---|----------|----|---|---|
| 54 | PI 525385 | 1244                   | Morocco  | Landrace                     | 135 | 159 | 4 | 787.037  | S  | 1 | 3 |
| 55 | PI 525386 | 1253                   | Morocco  | Landrace                     | 120 | 152 | 3 | 629.6296 | MS | 4 | - |
| 56 | PI 525387 | 1255                   | Morocco  | Landrace                     | 125 | 164 | 4 | 869.1358 | S  | 1 | 3 |
| 57 | PI 525370 | 1176                   | Morocco  | Landrace                     | 140 | 145 | 3 | 598.7654 | MR | 2 | - |
| 58 | PI 525335 | 1011b                  | Morocco  | Landrace                     | 150 | 159 | 4 | 622.8395 | MS | 3 | - |
| 59 | PI 525368 | 1150                   | Morocco  | Landrace                     | 130 | 145 | 3 | 564.8148 | MR | 2 | - |
|    |           |                        |          | Uncertain improvement status |     |     |   |          |    |   |   |
| 60 | PI 525381 | 1225                   | Morocco  | status                       | 140 | 159 | 3 | 663.5802 | MS | 1 | - |
|    |           |                        |          | Uncertain improvement status |     |     |   |          |    |   |   |
| 61 | PI 525382 | 1227                   | Morocco  | status                       | 160 | 159 | 2 | 353.7037 | R  | 3 | 2 |
| 62 | PI 525373 | 1190                   | Morocco  | Landrace                     | 125 | 154 | 3 | 511.1111 | MR | 4 | - |
| 63 | PI 517188 | GR 296                 | Morocco  | Landrace                     | 85  | 138 | 2 | 394.4444 | R  | 2 | 1 |
| 64 | PI 525432 | 1356                   | Morocco  | Landrace                     | 135 | 159 | 5 | 750.6173 | S  | 1 | 3 |
|    |           |                        |          | Uncertain improvement status |     |     |   |          |    |   |   |
| 65 | PI 191814 | H 22 B 13377           | Portugal | status                       | 125 | 156 | 3 | 725.9259 | S  | 1 | 3 |
| 66 | PI 191836 | 3220                   | Portugal | Breeding material            | 110 | 159 | 3 | 461.7284 | R  | 4 | 4 |
|    |           |                        |          | Uncertain improvement status |     |     |   |          |    |   |   |
| 67 | PI 191839 | H 22 B 13376           | Portugal | status                       | 135 | 152 | 2 | 353.7037 | R  | 3 | 2 |
| 68 | PI 266905 | Preto Amarelo          | Portugal | Landrace                     | 130 | 159 | 2 | 335.1852 | R  | 3 | 4 |
| 69 | PI 269237 | I 834                  | Portugal | Breeding material            | 135 | 159 | 2 | 629.6296 | MS | 1 | - |
| 70 | PI 270134 | Lobeiro                | Portugal | Landrace                     | 130 | 164 | 2 | 508.0247 | MR | 3 | - |
| 71 | PI 270135 | Balatuta               | Portugal | Landrace                     | 145 | 164 | 2 | 335.1852 | R  | 3 | 2 |
|    |           |                        |          | Uncertain improvement status |     |     |   |          |    |   |   |
| 72 | PI 278399 | Ideal Rijo             | Portugal | status                       | 140 | 159 | 2 | 541.9753 | MR | 3 | - |
|    |           |                        |          | Uncertain improvement status |     |     |   |          |    |   |   |
| 73 | PI 278401 | Yavardo Glauco Lobeiro | Portugal | status                       | 150 | 152 | 3 | 734.5679 | S  | 1 | 3 |
| 74 | PI 185186 | Ruivo                  | Portugal | Landrace                     | 120 | 150 | 2 | 308.642  | R  | 4 | 4 |

|    |           |            |          |             |     |     |   |          |    |   |   |
|----|-----------|------------|----------|-------------|-----|-----|---|----------|----|---|---|
|    |           | Mourisco   |          |             |     |     |   |          |    |   |   |
| 75 | PI 192439 | Ruivo      | Portugal | Landrace    | 120 | 159 | 5 | 725.9259 | S  | 1 | 3 |
| 76 | PI 192855 | Escuro     | Portugal | Landrace    | 120 | 159 | 3 | 551.8519 | MR | 4 | - |
| 77 | PI 192018 | Mourisco   | Portugal | Landrace    | 140 | 159 | 2 | 538.2716 | MR | 3 | - |
|    |           | Raspinegr  |          |             |     |     |   |          |    |   |   |
| 78 | PI 192036 | o          | Portugal | Landrace    | 130 | 159 | 4 | 734.5679 | S  | 1 | 3 |
| 79 | PI 192041 | Anafil     | Portugal | Landrace    | 130 | 159 | 4 | 577.7778 | MR | 1 | - |
| 80 | PI 221411 | Fanfarron  | Spain    | Landrace    | 145 | 159 | 3 | 511.1111 | MR | 3 | - |
|    |           | Carita de  |          |             |     |     |   |          |    |   |   |
| 81 | PI 47887  | Raton      | Spain    | Landrace    | 130 | 159 | 1 | 629.0123 | MS | 1 | - |
|    |           | Carita de  |          |             |     |     |   |          |    |   |   |
| 82 | PI 48208  | Raton      | Spain    | Landrace    | 130 | 152 | 1 | 663.5802 | MS | 1 | - |
|    |           | Macolo de  |          |             |     |     |   |          |    |   |   |
| 83 | PI 136573 | Jerez      | Spain    | Landrace    | 140 | 159 | 2 | 438.2716 | R  | 3 | 2 |
|    |           | Senatore   |          |             |     |     |   |          |    |   |   |
| 84 | PI 136576 | Capelli    | Spain    | Landrace    | 135 | 159 | 3 | 585.8025 | MR | 1 | - |
|    |           | Blanca de  |          |             |     |     |   |          |    |   |   |
| 85 | PI 47885  | Nules      | Spain    | Landrace    | 120 | 159 | 1 | 329.6296 | R  | 4 | 4 |
| 86 | PI 47894  | Baza       | Spain    | Landrace    | 140 | 152 | 1 | 367.284  | R  | 3 | 2 |
|    |           | Enano de   |          |             |     |     |   |          |    |   |   |
| 87 | PI 48209  | Jaen       | Spain    | Landrace    | 135 | 159 | 1 | 435.1852 | R  | 3 | 2 |
|    |           |            |          | Uncertain   |     |     |   |          |    |   |   |
|    |           |            |          | improvement |     |     |   |          |    |   |   |
| 88 | PI 42569  | Cltr 5142  | Spain    | status      | 155 | 159 | 1 | 329.6296 | R  | 3 | 2 |
|    |           |            |          | Uncertain   |     |     |   |          |    |   |   |
|    |           |            |          | improvement |     |     |   |          |    |   |   |
| 89 | PI 42570  | AUS 10115  | Spain    | status      | 135 | 159 | 1 | 380.2469 | R  | 3 | 2 |
|    |           | Cana       |          |             |     |     |   |          |    |   |   |
| 90 | PI 47886  | Maciza     | Spain    | Landrace    | 130 | 159 | 2 | 404.9383 | R  | 3 | 4 |
|    |           | Rubio      |          |             |     |     |   |          |    |   |   |
| 91 | PI 47892  | Candeal    | Spain    | Landrace    | 150 | 159 | 1 | 648.1481 | MS | 1 | - |
| 92 | PI 47893  | Semental   | Spain    | Landrace    | 140 | 159 | 1 | 268.5185 | R  | 3 | 2 |
| 93 | PI 278499 | Sevilla 26 | Spain    | Landrace    | 160 | 152 | 2 | 354.9383 | R  | 3 | 2 |
|    |           | 12899-2L-  |          | Breeding    |     |     |   |          |    |   |   |
| 94 | PI 519632 | 1AP-0AP    | Syria    | material    | 95  | 138 | 2 | 585.8025 | MR | 2 | - |
|    |           | A 4590-    |          |             |     |     |   |          |    |   |   |
|    |           | 51P-4P-2P- |          | Breeding    |     |     |   |          |    |   |   |
| 95 | PI 520398 | 2P         | Syria    | material    | 100 | 145 | 2 | 355.5556 | R  | 2 | 1 |

|     |           |             |        |                                    |     |     |   |          |    |   |   |
|-----|-----------|-------------|--------|------------------------------------|-----|-----|---|----------|----|---|---|
| 96  | PI 211688 | 173-39      | Turkey | Uncertain<br>improvement<br>status | 150 | 159 | 3 | 469.1358 | R  | 3 | 2 |
| 97  | PI 264966 | 44203       | Turkey | Landrace                           | 150 | 152 | 2 | 354.9383 | R  | 3 | 2 |
| 98  | PI 341417 | Acme        | Turkey | Uncertain<br>improvement<br>status | 140 | 159 | 3 | 513.5802 | MR | 3 | - |
| 99  | PI 422305 | Dicle 74    | Turkey | Cultivar                           | 115 | 159 | 2 | 656.7901 | MS | 1 | - |
| 100 | PI 341284 | Uveyik      | Turkey | Landrace                           | 130 | 152 | 2 | 797.5309 | S  | 1 | 3 |
| 101 | PI 182402 | 2532        | Turkey | Landrace                           | 120 | 159 | 2 | 294.4444 | R  | 4 | 4 |
| 102 | PI 341453 | Sari        | Turkey | Landrace                           | 130 | 164 | 3 | 507.4074 | MR | 3 | - |
| 103 | PI 341487 | Karakilcik  | Turkey | Landrace                           | 140 | 159 | 2 | 448.7654 | R  | 3 | 2 |
| 104 | PI 24605  | Cltr 4370   | Turkey | Landrace                           | 130 | 159 | 2 | 582.0988 | MR | 1 | - |
| 105 | PI 352402 | Izmir       | Turkey | Uncertain<br>improvement<br>status | 120 | 159 | 2 | 513.5802 | MR | 4 | - |
| 106 | PI 341446 | Sert        | Turkey | Landrace                           | 120 | 159 | 5 | 809.8765 | S  | 1 | 3 |
| 107 | PI 341374 | Kunduru     | Turkey | Landrace                           | 120 | 159 | 3 | 764.1975 | S  | 1 | 3 |
| 108 | PI 470740 | 79TK012-058 | Turkey | Landrace                           | 140 | 159 | 2 | 486.4198 | R  | 3 | 2 |
| 109 | PI 341330 | Ali Bayir   | Turkey | Landrace                           | 130 | 152 | 4 | 497.5309 | MR | 4 | - |
| 110 | PI 341360 | Kunduru     | Turkey | Landrace                           | 135 | 159 | 4 | 617.9012 | MS | 1 | - |
| 111 | PI 341612 | Sari Basak  | Turkey | Landrace                           | 125 | 164 | 3 | 729.6296 | S  | 1 | 3 |
| 112 | PI 341613 | Karakilcik  | Turkey | Landrace                           | 125 | 145 | 2 | 513.5802 | MR | 2 | - |
| 113 | PI 341723 | Bugday      | Turkey | Landrace                           | 115 | 152 | 2 | 512.3457 | MR | 4 | - |

**Table S2:** The area under disease progress curve (AUDPC) of checks implemented in the experimental design

|         | AUDPC Rep1 | AUDPC Rep2 | AUDPC Rep3 | AUDPC Rep4 | average | Standard<br>deviation |
|---------|------------|------------|------------|------------|---------|-----------------------|
| ‘Nasr’  | 701.235    | 720.988    | 728.395    | 735.802    | 721.605 | 14.866                |
| ‘Salim’ | 490.123    | 488.889    | 523.457    | 469.136    | 492.901 | 22.526                |
